# Supplementary material for: Negatively charged boron nitride nanosheets as a potential metal-free electrocatalyst for the oxygen reduction reaction: a computational study
Source: Royal Society of Chemistry journal article supplement (doi:10.1039/c8nj01228h), 2018-01-01
Supplement: c8nj01228h1.pdf [file c8nj01228h1.pdf]

## **Supporting Information**

### **Negatively Charged Boron Nitride Nanosheet as a Potential Metal-Free Electrocatalyst for Oxygen Reduction Reaction: a Computational Study**

Xin Wen,<sup>a</sup> Yongcheng Wang,<sup>a,\*</sup> Jingxiang Zhao<sup>b,\*</sup>

<sup>a</sup> College of Chemistry and Chemical Engineering, Northwest Normal University,  
Gansu, 730070, China

<sup>b</sup> College of Chemistry and Chemical Engineering, Harbin Normal University, Harbin,  
150025, China

\* To whom correspondence should be addressed. Email: ycwang@163.com (Y. C.);  
xjz\_hmily@163.com (J.X.)

**Figure S1**

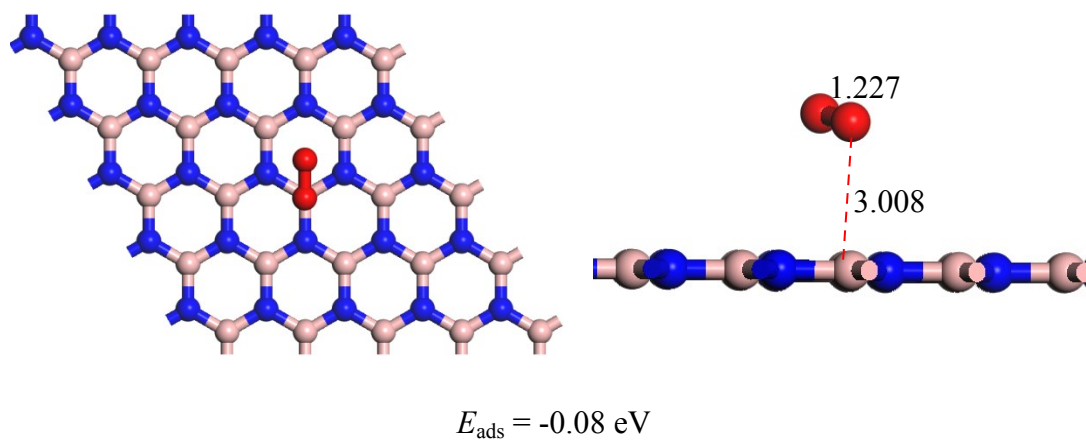

**Figure S1.** The optimized structures and adsorption energy of the adsorption of O<sub>2</sub> molecule on neutral BN sheet. The bond distance is in angstroms.

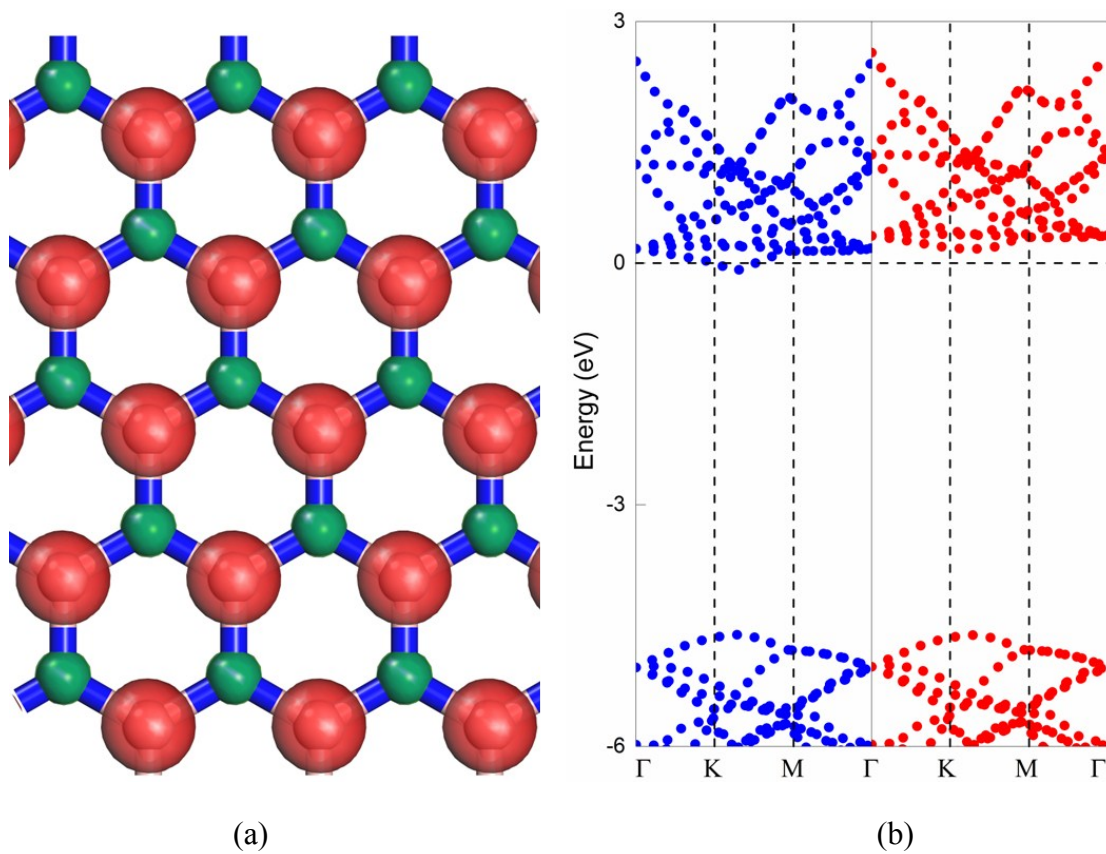

**Figure S2.** The computed (a) spin density iso-surface and (b) the band structure of negatively charged BN nanosheet. The Fermi level is set as zero in black dotted line.

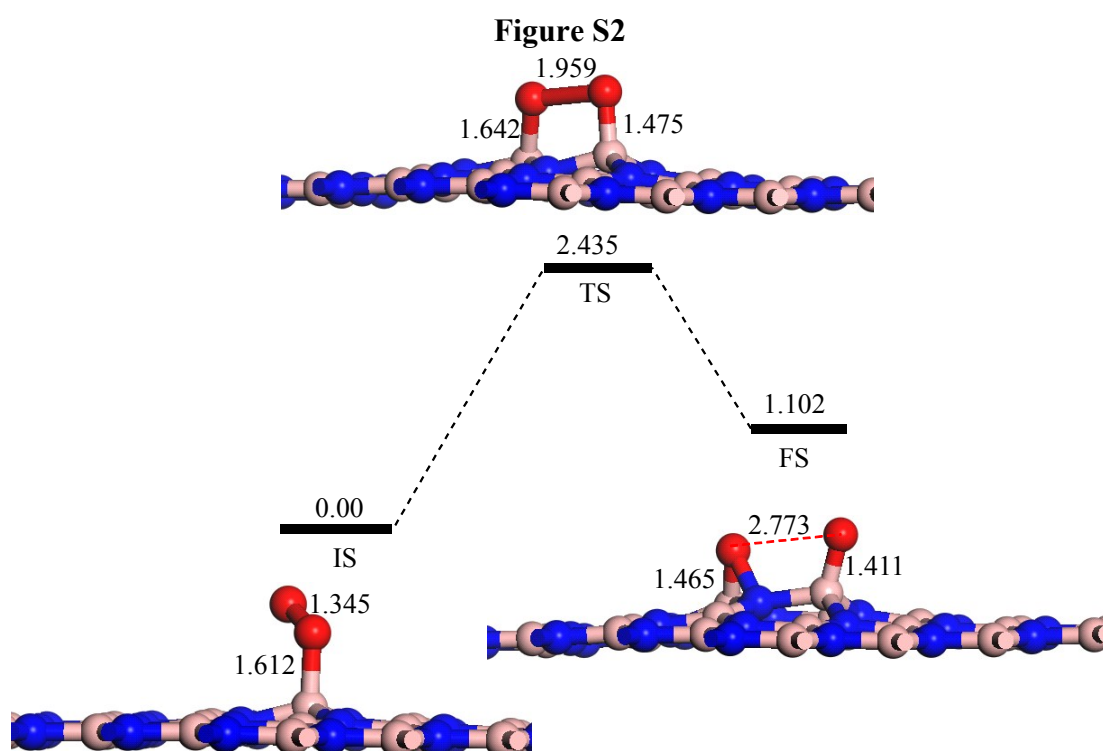

**Figure S3.** The MEP profile with the optimized geometries of reactants, transition states, and products for (a)  $O_{2(ads)} \rightarrow 2O_{(ads)}$  on negatively charged BN sheets. The bond distances are in angstroms.

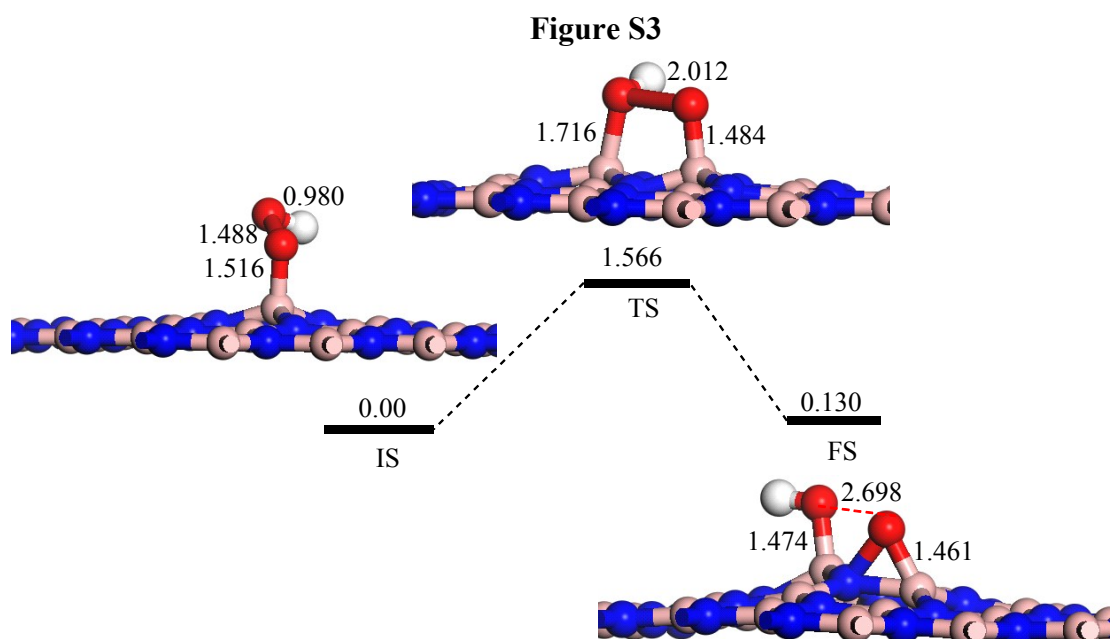

**Figure S4.** The MEP profile with the optimized geometries of reactants, transition states, and products for (a)  $\text{OOH}_{(\text{ads})} \rightarrow \text{O}_{(\text{ads})} + \text{OH}_{(\text{ads})}$  on negatively charged BN sheets. The bond distances are in angstroms.
